# Supplementary material for: Pathways to plant domestication in Southeast Anatolia based on new data from aceramic Neolithic Gusir Höyük
Source: PubMed Central journal article supplement (PMC7822836; doi:10.1038/s41598-021-81757-9), 2021-01-22
Supplement: 41598_2021_81757_MOESM1_ESM.pdf [file 41598_2021_81757_MOESM1_ESM.pdf]

## Supplementary Information

### Pathways to plant domestication in Southeast Anatolia based on new data from aceramic Neolithic Gusir Höyük

Ceren Kabukcu<sup>1,\*</sup>, Eleni Asouti<sup>1</sup>, Nadja Pöllath<sup>2</sup>, Joris Peters<sup>2,3</sup> & Necmi Karul<sup>4</sup>

<sup>1</sup> University of Liverpool, Department of Archaeology, Classics and Egyptology, Liverpool, L69 7WZ, UK.

<sup>2</sup> Staatliche Naturwissenschaftliche Sammlungen Bayerns, Staatssammlung für Anthropologie und Paläoanatomie München, Karolinenplatz 2a, Munich, 80333, Germany.

<sup>3</sup> Ludwig-Maximilians-Universität München, ArchaeoBioCenter and Institute of Palaeoanatomy, Domestication Research and the History of Veterinary Medicine, Munich, 80539, Germany.

<sup>4</sup> Istanbul University, Department of Prehistory, Istanbul, 34134, Turkey.

\*[C.Kabukcu@liverpool.ac.uk](mailto:C.Kabukcu@liverpool.ac.uk)

#### **This PDF file includes:**

Supplementary Figure S1  
Supplementary Tables S1-S2

#### **Additional supplementary materials for this manuscript include the following:**

Supplementary Data Files S1 to S8

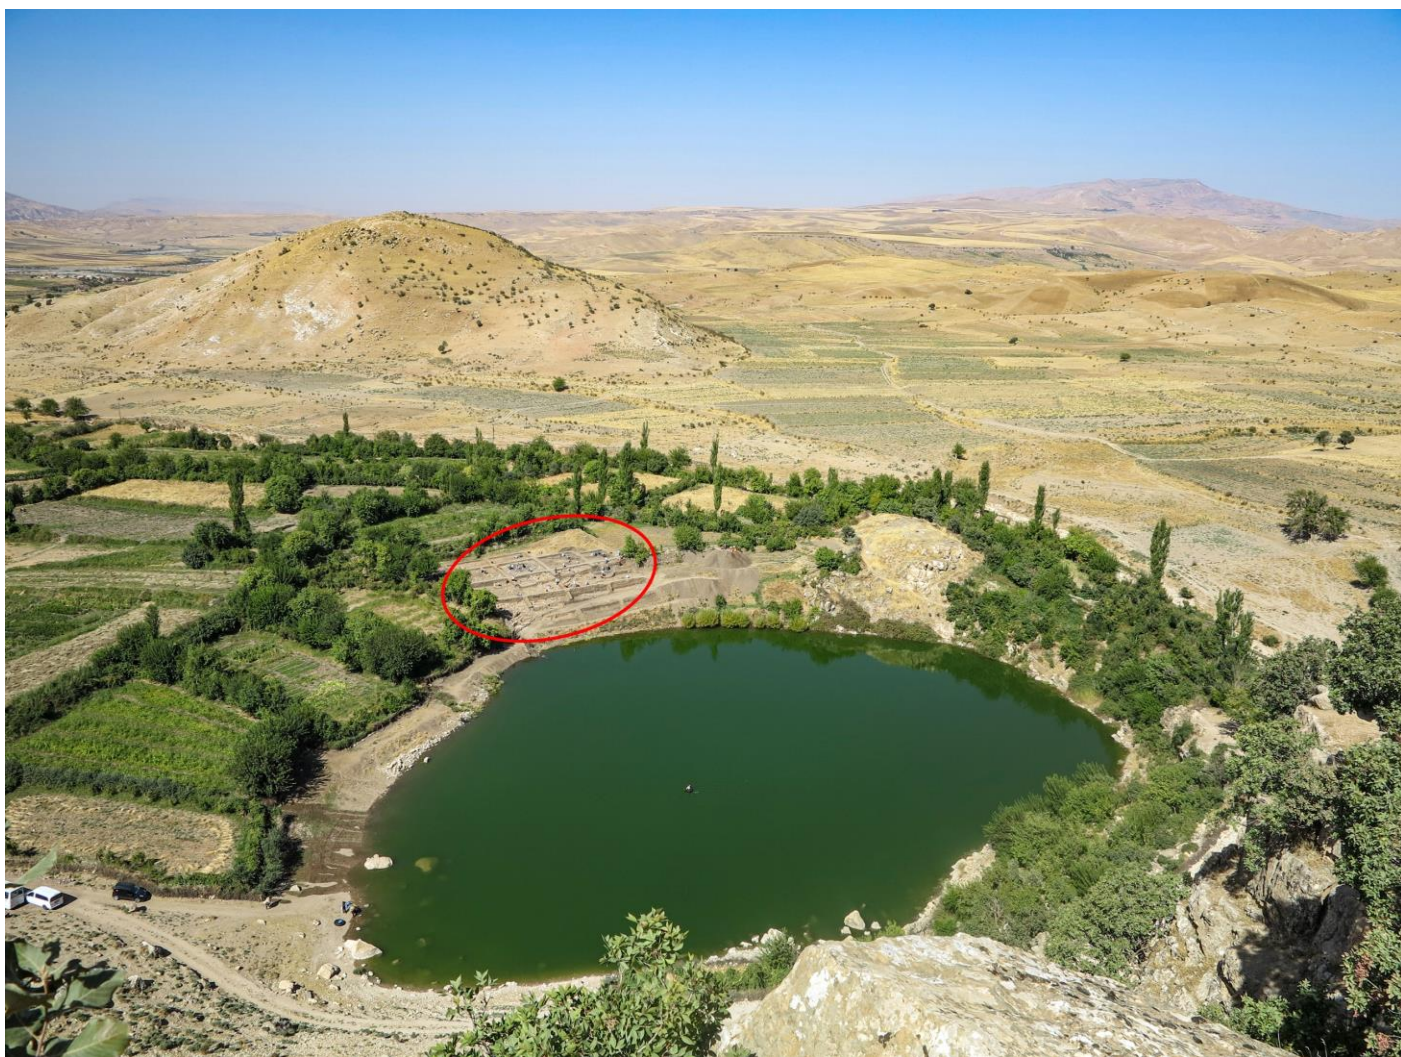

**Supplementary Fig. S1.** Photo showing the location of the excavated area (red circle) at Gusir Höyük next to the Gusir sinkhole lake (photo from the Gusir Höyük project archive).

**Supplementary Table S1.** Per phase counts of the charred plant macro-remains studied from Gusir Höyük: ~11.4-10.9 kyr cal BP group corresponds to the PPNA; ~10.5-10.3 kyr cal BP group corresponds to the EPPNB.

| Excavation grid square                                              | ~11.4-10.9 kyr cal BP              | ~10.5-10.3 kyr cal BP |                  | Total        |
|---------------------------------------------------------------------|------------------------------------|-----------------------|------------------|--------------|
|                                                                     | 20-M, N; 21-G, L, N; 22-J; 23-K, L | 23-M                  | 20-I             |              |
| <b>Context type</b>                                                 | <b>Building fills</b>              | <b>Ashy fills</b>     | <b>Fire pits</b> |              |
| <b>No of sampled contexts (= no of samples)</b>                     | <b>27</b>                          | <b>4</b>              | <b>5</b>         | <b>36</b>    |
| <b>Nutshell &amp; <i>Celtis</i></b>                                 |                                    |                       |                  |              |
| <i>Prunus</i> subg. <i>Amygdalus</i> nutshell (fragment count)      | 875                                | 8                     | 258              | <b>1141</b>  |
| <i>Prunus</i> subg. <i>Amygdalus</i> nutshell weight (g)            | 2.512                              | 0.017                 | 0.273            | <b>2.802</b> |
| <i>Pistacia</i> nutshell (fragment count)                           | 383                                | 25                    | 289              | <b>697</b>   |
| <i>Pistacia</i> nutshell weight (g)                                 | 0.56                               | 0.041                 | 0.154            | <b>0.755</b> |
| Nutshell indet. (fragment count)                                    | 386                                |                       | 117              | <b>503</b>   |
| <i>Celtis</i>                                                       | 2                                  | 3                     | 4                | <b>9</b>     |
| <b>Fabaceae</b>                                                     |                                    |                       |                  |              |
| <i>Lens</i> spp. (whole, cotyledon count)                           | 113                                | 8                     | 20               | <b>141</b>   |
| <i>Vicia</i> cf. <i>ervilia</i> (whole, cotyledon count)            | 51                                 | 13                    | 8                | <b>72</b>    |
| Vicieae indet. (whole, cotyledon count)                             | 31                                 | 2                     | 2                | <b>35</b>    |
| Vicieae indet. (fragment count)                                     | 18                                 |                       | 8                | <b>26</b>    |
| <i>Onobrychis</i> cf. <i>viciifolia</i> (whole, cotyledon count)    | 4                                  |                       |                  | <b>4</b>     |
| <i>Vicia/Lathyrus</i> (whole, cotyledon count)                      | 184                                | 24                    | 20               | <b>228</b>   |
| <i>Vicia/Lathyrus</i> (fragment count)                              | 45                                 |                       | 7                | <b>52</b>    |
| <i>Medicago radiata</i>                                             |                                    | 14                    | 1                | <b>15</b>    |
| <i>Astragalus/Trigonella</i>                                        |                                    | 10                    | 1                | <b>11</b>    |
| Fabaceae (small)                                                    |                                    | 3                     | 4                | <b>7</b>     |
| Fabaceae indet. (fragment count)                                    | 262                                | 31                    | 91               | <b>384</b>   |
| <b>Poaceae</b>                                                      |                                    |                       |                  |              |
| <i>Triticum boeoticum</i> (wide) (whole + apical/embryo)            |                                    | 34                    |                  | <b>34</b>    |
| <i>T. boeoticum</i> (wide) (fragment count)                         |                                    | 2                     |                  | <b>2</b>     |
| <i>T. boeoticum</i> (narrow) (whole + apical/embryo)                |                                    | 13                    |                  | <b>13</b>    |
| <i>T. turgidum</i> spp. <i>dicoccoides</i> (whole + apical/embryo)  |                                    | 14                    |                  | <b>14</b>    |
| <i>T. turgidum</i> spp. <i>dicoccoides</i> (fragment count)         |                                    | 3                     |                  | <b>3</b>     |
| <i>Triticum</i> spp. (fragment count)                               |                                    | 207                   |                  | <b>207</b>   |
| <i>T. boeoticum</i> chaff (spikelet fork count)                     |                                    | 3                     |                  | <b>3</b>     |
| <i>T. boeoticum</i> chaff (glume base count)                        |                                    | 9                     |                  | <b>9</b>     |
| <i>T. turgidum</i> spp. <i>dicoccoides</i> chaff (glume base count) |                                    | 1                     |                  | <b>1</b>     |
| <i>Triticum</i> spp. chaff (spikelet fork count)                    |                                    | 21                    |                  | <b>21</b>    |
| <i>Triticum</i> spp. chaff (glume base count)                       |                                    | 24                    |                  | <b>24</b>    |
| <i>Aegilops</i> spp. grain (whole + apical/embryo)                  |                                    | 2                     |                  | <b>2</b>     |
| <i>Aegilops</i> spp. chaff                                          |                                    | 3                     |                  | <b>3</b>     |
| Poaceae wild (small) grain (whole + apical/embryo)                  | 16                                 |                       | 6                | <b>22</b>    |
| Poaceae wild (small) (fragment count)                               | 75                                 | 16                    | 11               | <b>102</b>   |
| Poaceae wild (medium) grain (whole + apical/embryo)                 | 1                                  |                       | 5                | <b>6</b>     |
| Poaceae indet. (fragment count)                                     | 12                                 | 4                     | 28               | <b>44</b>    |
| Poaceae culm                                                        | 2                                  | 12                    | 3                | <b>17</b>    |

|                                           |             |            |            |             |
|-------------------------------------------|-------------|------------|------------|-------------|
| <b>Wild/weedy other</b>                   |             |            |            |             |
| <i>Gypsophila</i>                         | 12          | 1          | 2          | <b>15</b>   |
| <i>Silene</i>                             | 1           |            |            | <b>1</b>    |
| Brassicaceae                              | 14          |            |            | <b>14</b>   |
| <i>Brassica/Sinapis</i>                   | 29          |            |            | <b>29</b>   |
| <i>Neslia</i>                             | 1           |            |            | <b>1</b>    |
| Apiaceae (cf. <i>Lisea</i> )              | 1           |            |            | <b>1</b>    |
| Lamiaceae                                 | 2           | 4          |            | <b>6</b>    |
| <i>Galium</i>                             | 1           |            |            | <b>1</b>    |
| Cyperaceae ( <i>Bolboschoenus/Carex</i> ) | 7           | 3          | 4          | <b>14</b>   |
| <i>Adonis</i>                             |             | 1          |            | <b>1</b>    |
| Boraginaceae                              |             |            | 1          | <b>1</b>    |
| <i>Vitis sylvestris</i>                   |             |            | 1          | <b>1</b>    |
| Tuber/rhizome indet.                      | 5           |            |            | <b>5</b>    |
| <b>Non-wood NISP</b>                      | <b>2533</b> | <b>518</b> | <b>891</b> | <b>3942</b> |
| Cupule/Involucre fragment                 | 4           |            |            | <b>4</b>    |
| Amorphous charred plant/aggregate         | 67          |            | 15         | <b>82</b>   |
| <b>Wood charcoal &gt;2mm</b>              |             |            |            |             |
| <i>Prunus</i> subg. <i>Amygdalus</i>      | 378         |            | 15         | <b>393</b>  |
| <i>Pistacia</i>                           | 96          | 14         | 190        | <b>300</b>  |
| <i>Prunus</i>                             | 3           |            |            | <b>3</b>    |
| <i>Quercus</i>                            | 4           | 12         | 10         | <b>26</b>   |
| <i>Betula</i>                             | 10          | 84         | 3          | <b>97</b>   |
| <i>Acer</i>                               | 10          |            | 7          | <b>17</b>   |
| Maloideae                                 |             |            | 2          | <b>2</b>    |
| <i>Rhamnus</i>                            | 4           |            |            | <b>4</b>    |
| Ulmaceae/cf. <i>Celtis</i>                | 1           |            | 1          | <b>2</b>    |
| <i>Fraxinus</i>                           | 2           | 160        | 1          | <b>163</b>  |
| <i>Alnus</i>                              |             |            | 1          | <b>1</b>    |
| Chenopodiaceae                            | 1           |            |            | <b>1</b>    |
| <b>Wood charcoal &gt;2mm NISP</b>         | <b>509</b>  | <b>270</b> | <b>230</b> | <b>1009</b> |

**Supplementary Table S2.** Preliminary zooarchaeological results from PPNA contexts at Gusir Höyük, showing taxa with clear habitat preferences (NISP=Number of Identified Specimens; Habitat codes: M=mountain; G=Grassland; W=woodland; Wet/Aq=wetland/aquatic).

| Habitat | Taxon                                                                   | NISP |
|---------|-------------------------------------------------------------------------|------|
| M       | Wild goat, <i>Capra aegagrus</i>                                        | 334  |
| G       | Wild sheep, <i>Ovis orientalis</i>                                      | 768  |
| G       | Brown hare, <i>Lepus europaeus</i>                                      | 3    |
| G       | Chukar & Grey partridge, <i>Alectoris chukar</i> & <i>Perdix perdix</i> | 438  |
| W       | Aurochs, <i>Bos primigenius</i>                                         | 327  |
| W       | Red deer, <i>Cervus elaphus</i>                                         | 1392 |
| W       | Roe deer, <i>Capreolus capreolus</i>                                    | 19   |
| W       | Wild boar, <i>Sus scrofa</i>                                            | 501  |
| W       | Brown bear, <i>Ursus arctos</i>                                         | 5    |
| Wet/Aq  | Beaver, <i>Castor fiber</i>                                             | 3    |
| Wet/Aq  | Common crane, <i>Grus grus</i>                                          | 1    |
| Wet/Aq  | White-tailed eagle, <i>Haliaeetus albicilla</i>                         | 1    |
| Wet/Aq  | Fish                                                                    | 126  |
| Wet/Aq  | <i>Unio</i> shell                                                       | 7    |

**Supplementary Data File S1 (.xlsx file).** Radiocarbon dates from the Gusir Höyük excavation grid squares sampled for charred plant remains.

**Supplementary Data File S2 (.xlsx file).** Counts of charred plant remains retrieved from each sampled excavation grid square at Gusir Höyük, grouped by chronological phase and context type.

**Supplementary Data File S3 (.xlsx file).** Measurements of *Triticum* accessions - All specimens sourced from the John Innes Centre Germplasm Resource Unit (GRU) (Norwich, UK).

**Supplementary Data File S4 (.xlsx file).** Archaeological charred *Triticum* measurements from Gusir Höyük (GSR) and Çayönü (CAY).

**Supplementary Data File S5 (.xlsx file).** Archaeological charred *Triticum* grain measurements used in PCA, including missMDA imputed length measurements of incomplete Gusir Höyük grains.

**Supplementary Data File S6 (.xlsx file).** PCA results of the *Triticum* accessions measurements.

**Supplementary Data File S7 (.xlsx file).** PCA results of the archaeological charred *Triticum* measurements.

**Supplementary Data File S8 (.xlsx file).** Mean, minimum and maximum values and standard deviations of length, breadth and height measurements for each modern *Triticum* accession and the archaeological specimen groups.
